# Supplementary material for: The Characteristics of Ubiquitous and UniqueLeptospiraStrains from the Collection of Russian Centre for Leptospirosis
Source: Hindawi journal article supplement (doi:10.1155/2014/649034), 2014-01-01
Supplement: f1 [file 649034.f1.pdf]

S1. The range of nucleotide sequences similarity (rrs data) between and within groups of Leptospiraceae samples (L int - *L. interrogans*, L kir - *L. kirschneri*, L nog - *L. noguchii*, L wei - *L. weilii*, L ale - *L. alexanderi*, L bor - *L. borgpetersenii*, L san - *L. santarosai*, L als - *L. alstoni*, L kme - *L. kmetyi*, LBA - *L. species* Bairam-Ali, TURPA - *Turneriella parva*. INT - intermediate species, NON-PATH - non-pathogenic, PATH -pathogenic species) calculated by ClastalW2 (in %)

| rrs<br>max-min % | L ale     | L int     | L kir     | L bor     | L nog     | L san     | L wei     | L kme     | L als     | PATH      | INT       | NON-PATH  | LBA       | TURPA |
|------------------|-----------|-----------|-----------|-----------|-----------|-----------|-----------|-----------|-----------|-----------|-----------|-----------|-----------|-------|
| L ale            | 99.9-100  |           |           |           |           |           |           |           |           |           |           |           |           |       |
| L int            | 99.0-99.1 | 99.9-100  |           |           |           |           |           |           |           |           |           |           |           |       |
| L kir            | 99.0-99.2 | 99.7-99.9 | 99.9-100  |           |           |           |           |           |           |           |           |           |           |       |
| L bor            | 99.3-99.5 | 99.0-99.3 | 99.1-99.3 | 99.8-100  |           |           |           |           |           |           |           |           |           |       |
| L nog            | 98.8-98.9 | 99.2-99.3 | 99.3-99.3 | 99.0-99.1 | 99.9-100  |           |           |           |           |           |           |           |           |       |
| L san            | 98.7-99.0 | 98.7-98.9 | 98.7-99.0 | 99.0-99.3 | 98.9-99.0 | 99.8-100  |           |           |           |           |           |           |           |       |
| L wei            | 99.2-99.3 | 99.0-99.0 | 99.0-99.1 | 99.5-99.6 | 99.1-99.1 | 98.9-99.0 | 100       |           |           |           |           |           |           |       |
| L kme            | 98.7-98.8 | 99.0-99.0 | 99.0-99.0 | 98.9-99.0 | 99.0-99.0 | 98.5-98.7 | 98.8-98.8 | 100       |           |           |           |           |           |       |
| L als            | 97.8-98.9 | 98.1-99.1 | 98.2-99.1 | 98.0-98.9 | 98.1-99.0 | 97.6-98.6 | 97.9-98.7 | 98.6-99.4 | 99.1-99.1 |           |           |           |           |       |
| PATH             | 97.8-99.5 | 98.1-99.9 | 98.2-99.9 | 98.0-99.6 | 98.1-99.3 | 97.6-99.3 | 97.9-99.6 | 98.5-99.4 | 97.6-99.4 | 81.8-96.0 |           |           |           |       |
| INT              | 95.0-95.7 | 95.1-95.8 | 95.2-95.9 | 95.2-95.8 | 95.1-95.8 | 95.0-95.7 | 94.9-95.6 | 95.3-96.0 | 94.4-95.6 | 94.4-96.0 | 97.2-99.7 |           |           |       |
| NON-PATH         | 89.4-90.4 | 90.0-90.5 | 90.0-90.6 | 89.9-90.5 | 89.9-90.4 | 89.5-90.1 | 89.7-90.4 | 89.6-90.2 | 89.1-90.3 | 89.1-90.6 | 88.4-89.9 | 98.6-99.8 |           |       |
| LBA              | 90.3-90.4 | 90.9-91.0 | 90.8-90.8 | 90.7-90.8 | 90.7-90.7 | 90.7-90.8 | 90.7      | 90.7      | 90.0-90.7 | 90.0-91.0 | 90.8-91.1 | 91.7-92.7 | 100       |       |
| TURPA            | 82.2-82.4 | 82.4-82.4 | 82.4-82.5 | 82.7-82.7 | 82.5-82.5 | 82.5-82.5 | 82.3      | 82.5      | 81.8-82.4 | 81.8-82.7 | 82.7-83.3 | 81.4-81.9 | 82.0-82.0 | 100   |

S2. The range of nucleotide sequences similarity (rpoB data) between and within groups of Leptospiraceae samples (L int - *L. interrogans*, L kir - *L. kirschneri*, L nog - *L. noguchii*, L wei - *L. weilii*, L ale - *L. alexanderi*, L bor - *L. borgpetersenii*, L san - *L. santarosai*, L als - *L. alstoni*, L kme - *L. kmetyi*, LBA - *L. species* Bairam-Ali, TURPA - *Turneriella parva*. INT - intermediate species, NON-PATH - non-pathogenic, PATH -pathogenic species) calculated by ClastalW2 (in %)

| rpoB<br>max-min % | L ale     | L int     | L kir     | L bor     | L nog     | L san     | L wei     | L kme     | L als     | PATH      | INT       | NON-PATH  | LBA       | TURPA |
|-------------------|-----------|-----------|-----------|-----------|-----------|-----------|-----------|-----------|-----------|-----------|-----------|-----------|-----------|-------|
| L ale             | 93.2-93.2 |           |           |           |           |           |           |           |           |           |           |           |           |       |
| L int             | 85.3-90.0 | 89.1-100  |           |           |           |           |           |           |           |           |           |           |           |       |
| L kir             | 89.5-92.2 | 89.5-92.2 | 99.3-100  |           |           |           |           |           |           |           |           |           |           |       |
| L bor             | 85.3-91.2 | 88.3-100  | 88.1-94.2 | 88.3-100  |           |           |           |           |           |           |           |           |           |       |
| L nog             | 88.3-92.2 | 86.7-90.4 | 91.2-93.0 | 87.1-91.6 | 94.0-100  |           |           |           |           |           |           |           |           |       |
| L san             | 86.3-90.2 | 86.3-91.8 | 89.8-97.7 | 86.7-93.6 | 90.2-93.4 | 88.7-99.5 |           |           |           |           |           |           |           |       |
| L wei             | 86.1-89.1 | 89.1-90   | 89.3-89.5 | 88.7-91.4 | 88.3-90.4 | 88.3-89.1 | 100       |           |           |           |           |           |           |       |
| L kme             | 87.3-90.0 | 89.3-91.4 | 92.4-92.4 | 89.1-92.2 | 91.2-93.4 | 90.8-92.2 | 89.8-89.8 | 100       |           |           |           |           |           |       |
| L als             | 86.5-89.8 | 87.5-89.3 | 89.1-89.3 | 87.3-90.2 | 88.7-90.0 | 88.9-89.3 | 87.7-87.7 | 89.8-89.8 | 100       |           |           |           |           |       |
| PATH              | 85.3-92.2 | 85.3-100  | 86.7-97.7 | 85.3-100  | 86.7-93.4 | 86.3-97.7 | 87.7-89.8 | 89.8-92.4 | 87.7-89.8 | 85.3-100  |           |           |           |       |
| INT               | 72.2-75.5 | 72.0-76.1 | 72.0-74.4 | 71.6-76.1 | 73.4-76.9 | 71.4-77.7 | 73.0-74.4 | 74.9-75.9 | 75.3-76.3 | 71.4-77.7 | 78.1-100  |           |           |       |
| NON-PATH          | 61.2-67.1 | 59.3-66.3 | 62.0-66.5 | 61.8-66.9 | 62.4-68.9 | 62.8-68.5 | 63.4-69.3 | 63.0-66.5 | 63.4-67.1 | 59.3-69.3 | 60.2-66.1 | 85.8-100  |           |       |
| LBA               | 67.1-67.1 | 65.7-70.0 | 55.6-56.0 | 65.7-69.5 | 65.7-67.7 | 66.7-67.3 | 65.7      | 67.5      | 67.1      | 65.7-67.5 | 64.0-68.5 | 62.4-65.9 | 100       |       |
| TURPA             | 53.3-57.9 | 53.5-58.9 | 67.5-67.5 | 53.5-59.1 | 56.6-59.5 | 55.4-60.3 | 56.4      | 58.3      | 57.9      | 56.0-58.3 | 55.6-58.3 | 56.4-58.5 | 57.2-57.2 | 100   |

S3. The range of nucleotide sequences similarity (MLST data) between and within groups of Leptospiraceae samples (L int - *L. interrogans*, L kir - *L. kirschneri*, L nog - *L. noguchii*, L wei - *L. weilii*, L ale - *L. alexanderi*, L bor - *L. borgpetersenii*, L san - *L. santarosai*, L als - *L. alstoni*, L kme - *L. kmetyi*, LBA - *L. species* Bairam-Ali, TURPA - *Turneriella parva*. INT - intermediate species, NON-PATH - non-pathogenic, PATH - pathogenic species) calculated by ClastalW2 (in %)

| MLST<br>max-min % | L ale     | L int     | L kir     | L bor     | L nog     | L san     | L wei     | L kme     | L als     | PATH      | INT       | NON-<br>PATH | LBA  | TURPA |
|-------------------|-----------|-----------|-----------|-----------|-----------|-----------|-----------|-----------|-----------|-----------|-----------|--------------|------|-------|
| L ale             | 98.5-99.9 |           |           |           |           |           |           |           |           |           |           |              |      |       |
| L int             | 81.8-82.6 | 97.5-99.9 |           |           |           |           |           |           |           |           |           |              |      |       |
| L kir             | 81.9-82.7 | 92.4-93.9 | 98.1-99.9 |           |           |           |           |           |           |           |           |              |      |       |
| L bor             | 93.0-93.4 | 81.3-82.2 | 81.6-82.4 | 98.8-99.9 |           |           |           |           |           |           |           |              |      |       |
| L nog             | 80.8-82.0 | 91.2-91.9 | 90.8-91.9 | 80.7-81.8 | 96.8-99.5 |           |           |           |           |           |           |              |      |       |
| L san             | 87.5-88.1 | 81.4-82.1 | 81.4-82.1 | 86.8-87.3 | 80.9-81.7 | 99.2-99.8 |           |           |           |           |           |              |      |       |
| L wei             | 93.2-96.3 | 81.2-82.3 | 81.5-82.3 | 90.0-92.7 | 80.5-81.8 | 87.1-87.7 | 94.2-99.9 |           |           |           |           |              |      |       |
| L kme             | 83.6-84.3 | 80.2-81.8 | 81.1-82.0 | 82.1-82.7 | 80.7-81.9 | 84.3-84.3 | 83.2-85.2 | 100       |           |           |           |              |      |       |
| L als             | 84.9-85.7 | 82.1-83.0 | 82.7-83.8 | 83.8-84.3 | 81.9-83.3 | 84.8-85.3 | 84.9-86.4 | 86.2      | 100       |           |           |              |      |       |
| PATH              | 80.8-96.2 | 69.6-73.3 | 81.4-93.9 | 80.7-93.4 | 80.5-91.9 | 80.9-88.1 | 80.5-96.3 | 81.0-84.2 | 82.6-85.6 | 80.5-99.9 |           |              |      |       |
| INT               | 70.9-72.5 | 69.6-72.4 | 70.2-72.6 | 70.7-72.1 | 69.7-72.3 | 70.5-72.2 | 71.6-73.3 | 71.7-73.0 | 70.5-72.6 | 70.0-72.8 | 74.2-91.4 |              |      |       |
| NON-PATH          | 67.3-68.6 | 67.6-70   | 67.5-69.8 | 66.9-68.0 | 67.3-69.6 | 66.3-68.6 | 66.7-68.7 | 66.2-67.9 | 67.0-68.2 | 67.2-68.9 | 66.2-68.2 | 81.8-90.3    |      |       |
| LBA               | 68.3-68.8 | 68.3-69.7 | 67.6-69.1 | 67.7-68.3 | 68.4-69.6 | 66.2-67.1 | 66.5-68.7 | 66.9      | 66.5      | 66.2-69.7 | 65.8-67.3 | 67.6-69.1    | 100  |       |
| TURPA             | 56.7-57.1 | 52.9-55.3 | 53.8-57.1 | 57.0-57.5 | 54.1-56.6 | 56.3-58.9 | 56.8-58.6 | 58.3      | 58.1      | 53.5-58.2 | 55.9-58.3 | 55.4-56.8    | 55.3 | 100   |

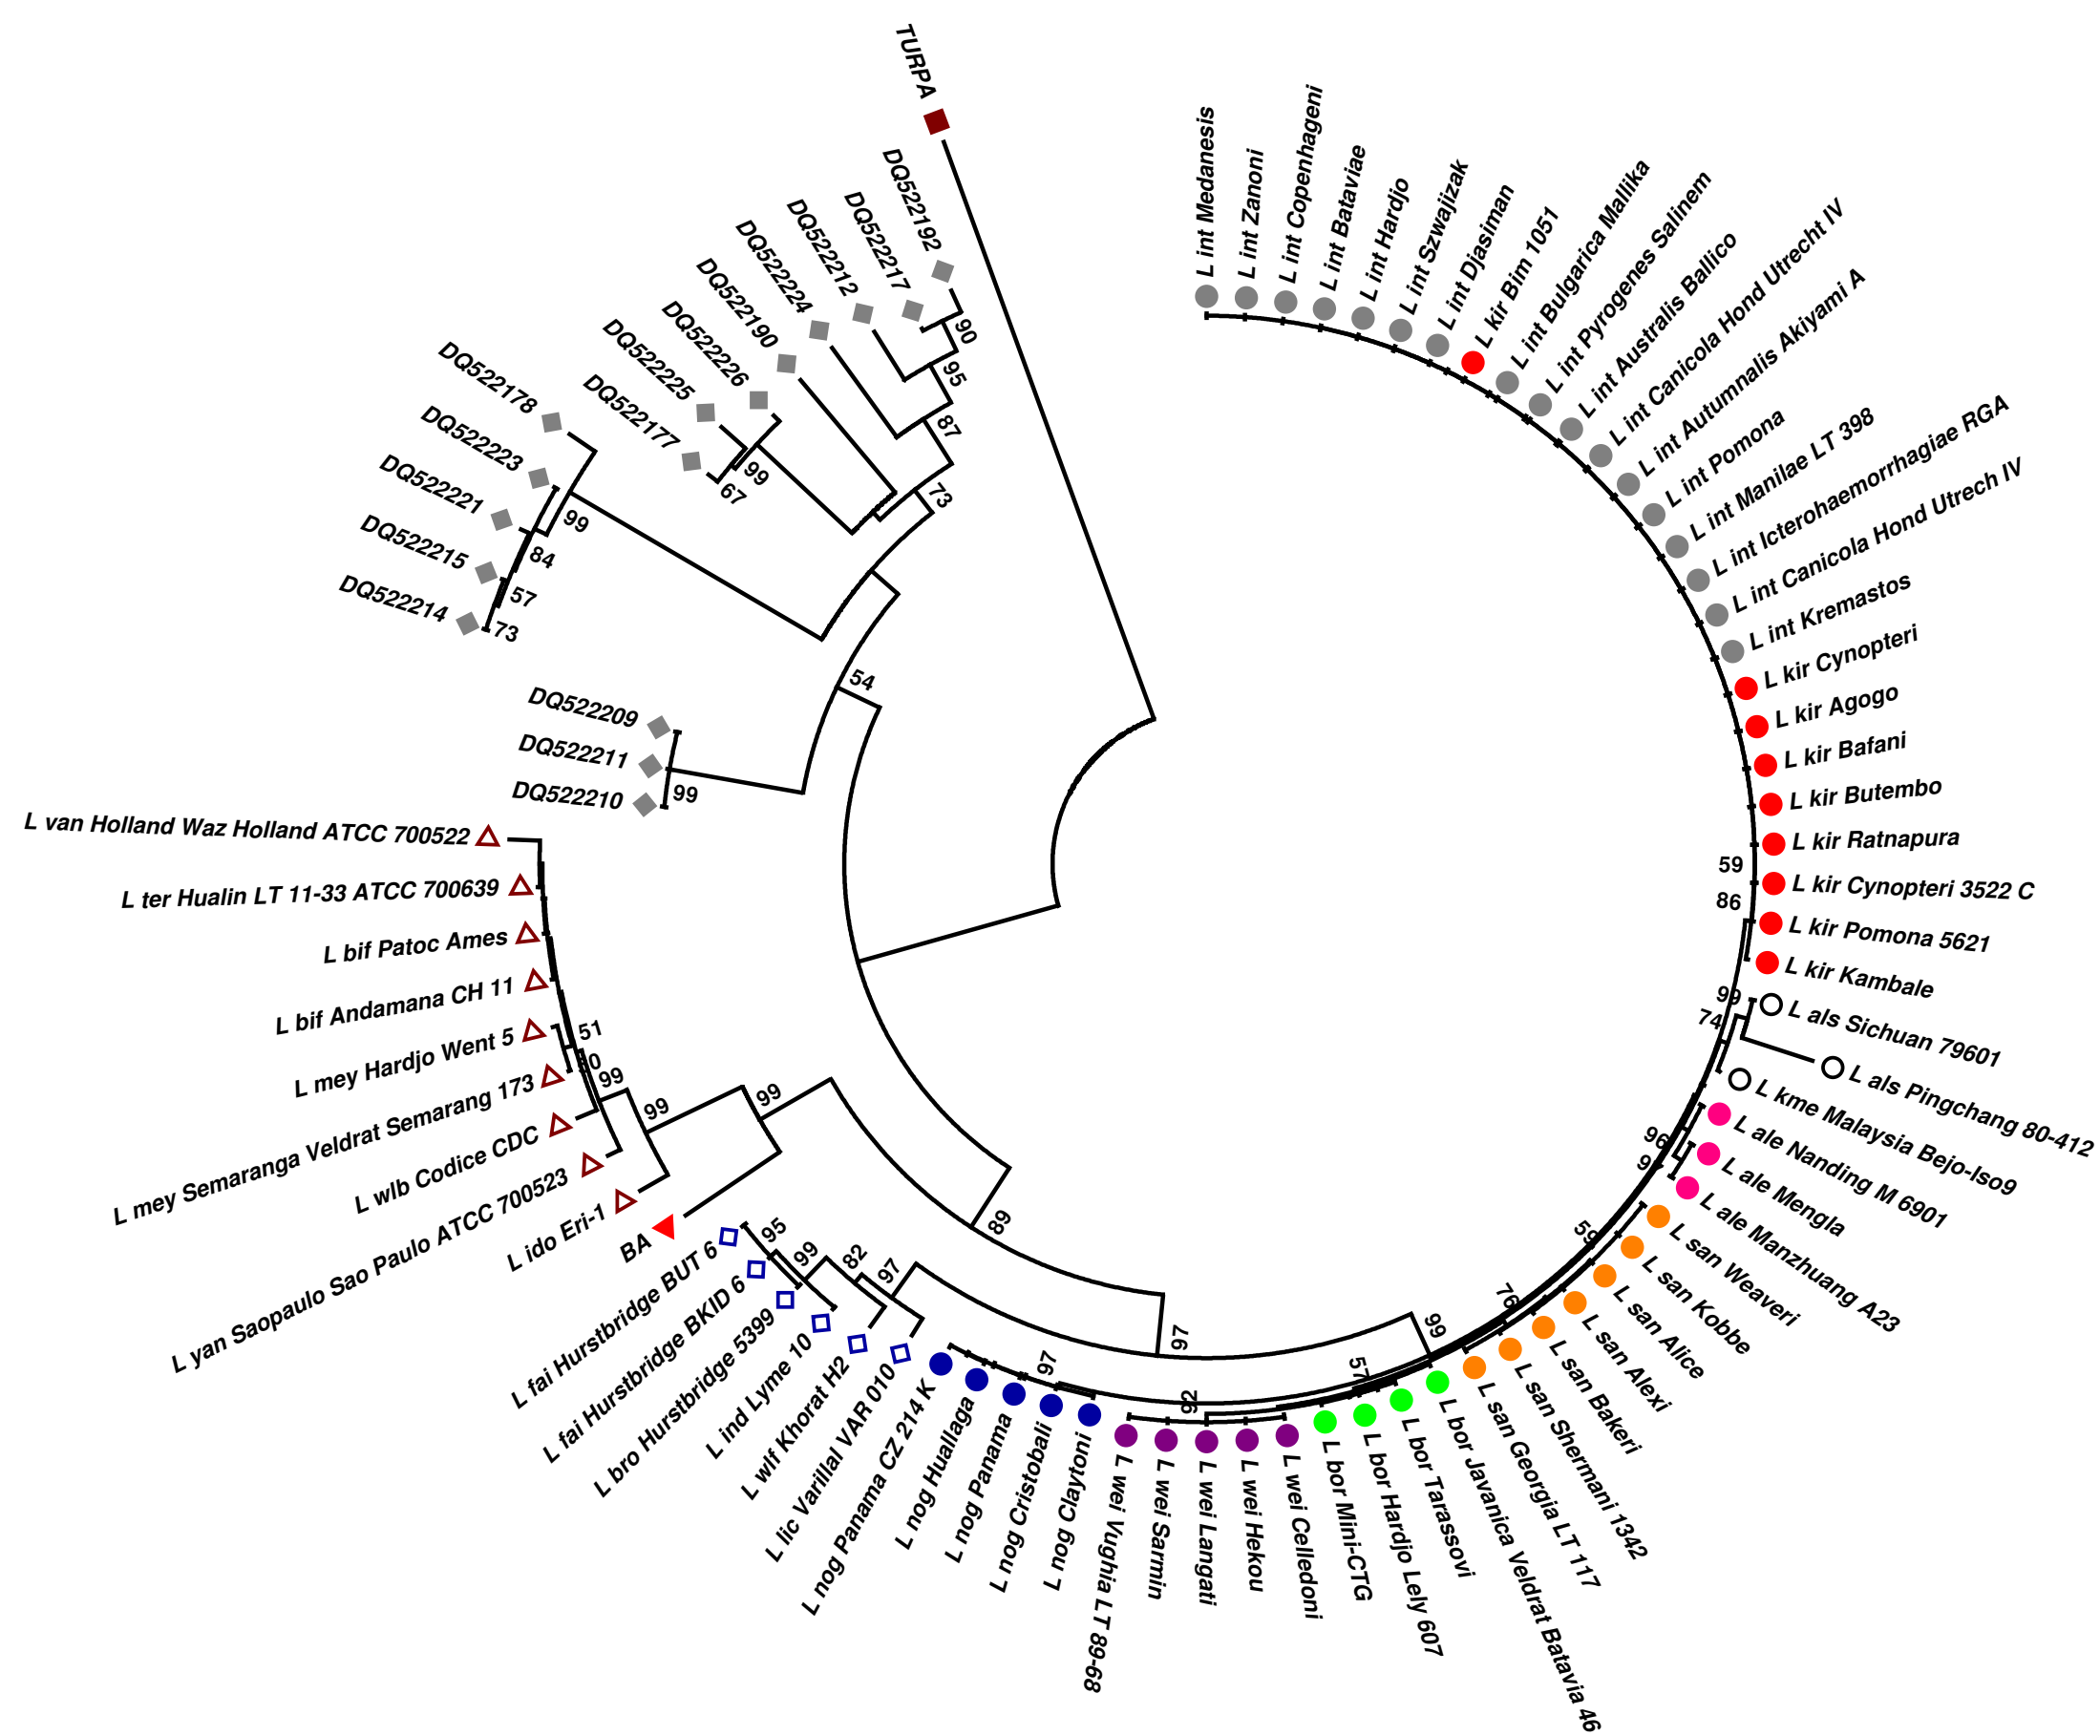

S4. Phylogenetic tree of *Leptospira* species based on 16S rDNA sequences.

Abbreviations: L int - *L. interrogans*, L kir - *L. kirschneri*, L nog - *L. noguchii*, L wei - *L. weilii*, L ale - *L. alexanderi*, L bor - *L. borgpetersenii*, L san - *L. santarosai*, L als - *L. alstoni*, L kme - *L. kmetyi*, L lic - *L. licerasiae*, L wlf - *L. wolffii*, fai - *L. fainei*, bro - *L. broomii*, L ind - *L. inadai*, bif - *L. biflexa*, yan - *L. yanagawae*, mey - *L. meyeri*, ter - *L. terpstae*, van - *L. vanthiellii*, wlb - *L. wolbachii*, BA - *L. species Bairam-Ali*, TURPA - *Turneriella parva*.

Different species or group of species have been marked in different colors. Gray diamonds indicate 16S rDNA sequences of leptospires from the Peruvian Amazon, previously termed "clade C" [38]
